# Supplementary material for: Continuous surveillance by the international differential system showed the spatiotemporal dynamics in rice blast pathogenicity in Vietnam
Source: Research Square preprint supplement (doi:10.21203/rs.3.rs-8525407/v1), 2026-01-13
Supplement: Supplementary file 1 [file a475fa8c779dc8bb2553691d.xlsx]

## Sheet: Additional file 1 Isolates 
Additional file 1. Regional and temporal distribution of blast isolates across province in Vietnam.
Area	Province	Year
		2007	2012	2013	2014	2015	2017	2018	2019	2020	2021	2022	2023	2024	Unknown	Total
Red Rive Delta
	Ha Noi	0	23	8	0	2	0	2	1	0	0	0	23	12	0	71
	Hai Phong	0	0	2	0	0	0	0	0	0	0	0	0	0	0	2
	Hai Duong	0	5	4	0	0	0	0	2	0	0	0	0	0	0	11
	Hung Yen	0	7	0	0	0	0	0	0	0	0	0	0	0	0	7
	Thai Binh	0	11	3	0	0	0	0	2	0	0	0	0	0	0	16
	Nam Dinh	0	2	5	0	0	0	0	0	0	0	0	0	0	0	7
	Ninh Binh	0	4	0	0	0	0	0	1	0	0	0	0	0	0	5
	Vinh Phuc	0	0	3	0	0	0	0	0	0	0	0	0	0	0	3
	Bac Ninh	0	0	0	4	0	0	0	0	0	0	0	0	0	0	4
	Ha Nam	0	13	0	0	0	0	0	1	0	0	24	19	14	0	71
Northern Mountain
	Son La	0	6	4	0	0	0	0	0	0	0	10	0	0	0	20
	Hoa Binh	0	0	3	0	5	0	0	7	0	0	4	0	0	0	19
	Dien Bien	0	0	19	0	0	0	0	0	0	0	31	0	0	0	50
	Lai Chau	0	0	2	0	0	0	2	0	0	0	10	0	0	0	14
	Yen Bai	0	0	0	0	0	0	1	2	0	0	2	8	54	0	67
	Lao Cai	0	0	0	0	0	0	2	0	0	0	7	0	3	0	12
	Cao Bang	0	0	2	3	0	0	0	0	0	0	0	0	0	0	5
	Quang Ninh	0	2	0	0	0	0	1	1	0	0	0	0	0	0	4
	Thai Nguyen	0	0	1	8	0	0	1	0	0	0	0	0	0	0	10
	Tuyen Quang	0	0	1	0	0	0	0	0	0	0	0	0	0	0	1
	Bac Giang	0	0	0	4	0	0	0	0	0	0	0	0	0	0	4
	Phu Tho	0	0	9	0	0	0	0	0	0	0	0	0	0	0	9
	Lang Son	0	0	0	4	0	0	0	0	0	0	0	0	0	0	4
	Bac Kan	0	2	0	9	0	0	0	0	0	0	0	0	0	0	11
North Central
	Quang Tri	0	0	0	4	0	0	0	0	0	0	0	0	6	0	10
	Quang Binh	0	0	0	4	0	0	0	0	0	0	0	0	0	0	4
	Nghe An	0	7	0	7	8	0	0	6	0	0	0	0	4	0	32
	Thanh Hoa	0	6	1	0	13	0	0	7	1	1	0	0	0	0	29
	Ha Tinh	0	0	0	11	0	10	0	0	0	0	0	0	0	0	21
	Thua Thien Hue	0	0	0	6	0	0	13	0	0	0	0	0	51	0	70
South Central Coast
	Khanh Hoa	0	0	0	0	9	0	0	0	0	0	0	0	0	0	9
	Quang Ngai	0	0	0	0	6	0	1	0	0	0	0	0	0	0	7
	Quang Nam	0	0	0	0	2	0	1	0	0	0	0	0	0	0	3
	Binh Dinh	0	0	0	0	14	0	0	0	0	0	0	0	0	0	14
	Phu Yen	0	0	0	0	4	0	0	0	0	0	0	0	0	0	4
	Da Nang	0	0	0	0	1	0	0	0	0	0	0	0	0	0	1
Central Highlands
	Gia Lai	0	0	0	0	2	0	0	0	0	0	0	0	0	0	2
South East
	Ho Chi Minh	0	0	1	0	0	0	0	0	0	0	0	0	0	0	1
Mekong Delta
	An Giang	0	0	0	0	0	0	0	0	0	14	0	0	0	0	14
	Vinh Long	16	0	0	0	0	0	0	0	0	10	0	0	0	0	26
	Kien Giang	0	0	0	0	0	0	0	0	0	18	0	0	0	0	18
	Tra Vinh	11	0	0	0	0	0	0	0	0	1	0	0	0	0	12
	Hau Giang	0	0	0	0	0	0	0	0	0	5	0	0	0	0	5
	Bac Lieu	13	0	0	0	0	0	0	0	0	0	0	0	0	0	13
	Dong Thap	3	0	0	0	0	0	0	0	0	6	0	0	0	0	9
	Long An	20	0	17	0	0	0	0	0	0	13	0	0	1	0	51
	Can Tho	0	0	0	0	0	0	0	0	0	12	0	0	0	0	12
Unknown		1	0	0	0	0	0	0	0	0	0	0	0	0	12	13
Total		64	88	85	64	66	10	24	30	1	80	88	50	145	12	807
