# Supplementary material for: Continuous surveillance by the international differential system showed the spatiotemporal dynamics in rice blast pathogenicity in Vietnam
Source: Research Square preprint supplement (doi:10.21203/rs.3.rs-8525407/v1), 2026-01-13
Supplement: Supplementary file 3 [file fdb9128298c283f29caa2008.xlsx]

## Sheet: Supplemental Table 2 Race
	Additional file 2 Number of Isolates in Race designation and Ecotypic Areas
	Race designation	Ecotypic Area									Total
		CH	MD	NC	NE	NW	RRD	SE	SSC	Unknown
	U63-i7-k100-z04-ta403		2	7	9	1	30				49
	U63-i7-k100-z05-ta403			3	3	2	10		2		20
	U63-i7-k100-z01-ta403			6	5	1	1		5		18
	U63-i0-k100-z04-ta403		9				1	1		3	14
	U63-i7-k100-z01-ta423			7	1		2		2		12
	U73-i7-k100-z01-ta423			2			9				11
	U63-i7-k100-z00-ta403			1	2		5		1		9
	U73-i7-k100-z01-ta433						9				9
	U63-i0-k100-z04-ta401		7								7
	U73-i7-k100-z04-ta433			4			2				6
	U63-i0-k104-z04-ta421		5								5
	U63-i7-k000-z01-ta431				5						5
	U63-i7-k100-z01-ta402				3				2		5
	U63-i7-k107-z01-ta433			1	1	2	1				5
	U23-i6-k101-z00-ta600						4				4
	U63-i0-k100-z04-ta421		4								4
	U63-i6-k100-z00-ta700		4								4
	U63-i6-k100-z05-ta403				1	2			1		4
	U63-i7-k100-z07-ta423			4							4
	U23-i0-k100-z00-ta402		2	1							3
	U23-i6-k100-z00-ta600			1			2				3
	U23-i6-k100-z00-ta700		2				1				3
	U61-i7-k100-z04-ta403			3							3
	U63-i0-k100-z00-ta702		3								3
	U63-i4-k100-z00-ta403		1			2					3
	U63-i5-k100-z05-ta403			1	1		1				3
	U63-i6-k100-z00-ta402			2		1					3
	U63-i7-k100-z01-ta431				3						3
	U63-i7-k100-z01-ta433				1		2				3
	U63-i7-k100-z04-ta003			1			2				3
	U63-i7-k100-z04-ta401						3				3
	U63-i7-k106-z01-ta403					3					3
	U73-i7-k100-z04-ta423			1			2				3
	U21-i4-k100-z00-ta400						2				2
	U23-i0-k100-z00-ta702		2								2
	U23-i4-k100-z00-ta402						2				2
	U23-i4-k100-z00-ta403			1			1				2
	U23-i6-k101-z02-ta700						2				2
	U33-i4-k100-z00-ta402				1		1				2
	U33-i4-k100-z00-ta403			1			1				2
	U33-i6-k101-z00-ta700						2				2
	U41-i6-k177-z00-ta233				2						2
	U43-i7-k100-z00-ta003				2						2
	U43-i7-k100-z00-ta023				2						2
	U43-i7-k100-z01-ta002					1			1		2
	U43-i7-k100-z04-ta403					1	1				2
	U61-i0-k100-z04-ta401		2								2
	U63-i0-k000-z04-ta421		2								2
	U63-i0-k100-z01-ta402								2		2
	U63-i0-k100-z05-ta403								1	1	2
	U63-i0-k100-z06-ta403									2	2
	U63-i0-k100-z14-ta403		1							1	2
	U63-i0-k102-z00-ta702		2								2
	U63-i2-k000-z00-ta700		2								2
	U63-i2-k100-z00-ta700		2								2
	U63-i4-k100-z00-ta402			2							2
	U63-i4-k100-z01-ta402			1					1		2
	U63-i4-k100-z01-ta403		1	1							2
	U63-i4-k100-z05-ta403		1				1				2
	U63-i5-k100-z01-ta402					1	1				2
	U63-i5-k100-z04-ta403		1	1							2
	U63-i6-k100-z04-ta401		2								2
	U63-i6-k100-z04-ta403		1				1				2
	U63-i7-k000-z00-ta431				2						2
	U63-i7-k000-z04-ta403			1			1				2
	U63-i7-k100-z00-ta423					1	1				2
	U63-i7-k100-z01-ta633			1		1					2
	U63-i7-k100-z04-ta402				1	1					2
	U63-i7-k100-z04-ta423						2				2
	U63-i7-k100-z05-ta003			2							2
	U63-i7-k100-z05-ta422						2				2
	U63-i7-k100-z05-ta423			2							2
	U63-i7-k100-z07-ta403					1	1				2
	U63-i7-k100-z07-ta633				2						2
	U63-i7-k102-z01-ta431				2						2
	U63-i7-k102-z05-ta403		1	1							2
	U63-i7-k104-z06-ta633		1			1					2
	U63-i7-k106-z00-ta033						2				2
	U63-i7-k177-z01-ta333				2						2
	U73-i6-k100-z00-ta423			1			1				2
	U73-i6-k100-z04-ta433			2							2
	U73-i7-k100-z00-ta433						2				2
	U73-i7-k100-z07-ta433				1	1					2
	U73-i7-k104-z01-ta433					2					2
	U73-i7-k107-z15-ta633			1		1					2
	U01-i0-k100-z00-ta200						1				1
	U01-i6-k000-z01-ta401		1								1
	U01-i6-k100-z00-ta403								1		1
	U02-i0-k001-z00-ta400		1								1
	U03-i0-k000-z00-ta002									1	1
	U03-i1-k000-z05-ta430				1						1
	U03-i4-k000-z00-ta431				1						1
	U03-i6-k103-z00-ta700		1								1
	U03-i6-k117-z04-ta003				1						1
	U03-i6-k173-z05-ta023				1						1
	U03-i7-k100-z05-ta403	1									1
	U21-i0-k000-z00-ta002		1								1
	U21-i0-k000-z04-ta420		1								1
	U21-i0-k100-z00-ta402			1							1
	U21-i0-k100-z00-ta403			1							1
	U21-i0-k100-z04-ta401		1								1
	U21-i2-k004-z00-ta001					1					1
	U21-i4-k000-z01-ta402				1						1
	U21-i4-k100-z01-ta401						1				1
	U21-i4-k100-z03-ta421						1				1
	U21-i5-k100-z00-ta423			1							1
	U21-i6-k100-z00-ta400						1				1
	U21-i6-k100-z00-ta701		1								1
	U21-i6-k100-z01-ta000						1				1
	U21-i6-k100-z04-ta403						1				1
	U21-i6-k100-z05-ta003						1				1
	U21-i7-k000-z00-ta431				1						1
	U21-i7-k100-z01-ta401			1							1
	U21-i7-k100-z01-ta431				1						1
	U22-i6-k100-z10-ta700		1								1
	U23-i0-k000-z00-ta500		1								1
	U23-i0-k000-z00-ta502		1								1
	U23-i0-k000-z00-ta602		1								1
	U23-i0-k000-z00-ta702									1	1
	U23-i0-k000-z04-ta403		1								1
	U23-i0-k000-z04-ta421		1								1
	U23-i0-k000-z10-ta400		1								1
	U23-i0-k100-z00-ta400			1							1
	U23-i0-k100-z01-ta602		1								1
	U23-i0-k100-z02-ta502		1								1
	U23-i0-k100-z04-ta401		1								1
	U23-i0-k100-z04-ta403		1								1
	U23-i0-k100-z05-ta003			1							1
	U23-i0-k102-z00-ta702		1								1
	U23-i2-k100-z00-ta500		1								1
	U23-i2-k100-z00-ta700		1								1
	U23-i3-k102-z01-ta032				1						1
	U23-i4-k000-z00-ta000		1								1
	U23-i4-k100-z00-ta720		1								1
	U23-i4-k100-z02-ta402		1								1
	U23-i4-k100-z04-ta403						1				1
	U23-i4-k101-z00-ta700		1								1
	U23-i4-k101-z10-ta723		1								1
	U23-i4-k104-z10-ta402		1								1
	U23-i4-k120-z04-ta400		1								1
	U23-i4-k120-z10-ta400		1								1
	U23-i6-k001-z06-ta700		1								1
	U23-i6-k002-z01-ta431					1					1
	U23-i6-k100-z00-ta300		1								1
	U23-i6-k100-z00-ta401			1							1
	U23-i6-k100-z00-ta402		1								1
	U23-i6-k100-z04-ta403						1				1
	U23-i6-k100-z05-ta403						1				1
	U23-i6-k100-z16-ta611		1								1
	U23-i6-k101-z00-ta700						1				1
	U23-i6-k101-z04-ta700						1				1
	U23-i6-k104-z00-ta700						1				1
	U23-i6-k124-z02-ta002			1							1
	U23-i7-k100-z00-ta422						1				1
	U23-i7-k100-z02-ta612		1								1
	U23-i7-k100-z04-ta401			1							1
	U33-i0-k000-z00-ta702		1								1
	U33-i0-k100-z00-ta402			1							1
	U33-i4-k100-z00-ta423			1							1
	U33-i4-k100-z14-ta723		1								1
	U33-i4-k104-z00-ta412		1								1
	U33-i6-k100-z00-ta403			1							1
	U33-i6-k100-z00-ta423			1							1
	U33-i6-k100-z04-ta433			1							1
	U33-i6-k100-z12-ta403								1		1
	U33-i7-k100-z00-ta403			1							1
	U33-i7-k100-z00-ta410		1								1
	U33-i7-k100-z00-ta423			1							1
	U33-i7-k100-z04-ta423			1							1
	U33-i7-k140-z04-ta402			1							1
	U40-i4-k100-z00-ta000						1				1
	U41-i0-k000-z03-ta030					1					1
	U41-i6-k147-z00-ta031						1				1
	U41-i6-k147-z00-ta233				1						1
	U43-i0-k000-z00-ta401		1								1
	U43-i0-k000-z01-ta030				1						1
	U43-i0-k000-z03-ta632				1						1
	U43-i0-k100-z04-ta403			1							1
	U43-i1-k100-z00-ta031					1					1
	U43-i3-k100-z00-ta401						1				1
	U43-i4-k100-z04-ta403		1								1
	U43-i5-k000-z03-ta631				1						1
	U43-i5-k100-z00-ta402			1							1
	U43-i5-k177-z13-ta733			1							1
	U43-i6-k107-z07-ta733					1					1
	U43-i6-k136-z07-ta233					1					1
	U43-i6-k173-z04-ta023				1						1
	U43-i7-k100-z00-ta001				1						1
	U43-i7-k100-z00-ta031				1						1
	U43-i7-k100-z00-ta403			1							1
	U43-i7-k100-z01-ta003								1		1
	U43-i7-k100-z01-ta021				1						1
	U43-i7-k100-z01-ta423						1				1
	U43-i7-k100-z05-ta403				1						1
	U43-i7-k100-z05-ta633			1							1
	U43-i7-k102-z01-ta021				1						1
	U43-i7-k102-z05-ta403						1				1
	U43-i7-k106-z07-ta031				1						1
	U43-i7-k106-z11-ta433						1				1
	U43-i7-k107-z07-ta031				1						1
	U43-i7-k117-z07-ta031				1						1
	U43-i7-k177-z03-ta333				1						1
	U43-i7-k177-z03-ta733				1						1
	U43-i7-k177-z06-ta021					1					1
	U43-i7-k177-z17-ta223				1						1
	U53-i7-k107-z07-ta031				1						1
	U53-i7-k107-z07-ta231				1						1
	U53-i7-k177-z02-ta333			1							1
	U60-i6-k100-z00-ta500		1								1
	U61-i0-k102-z01-ta411					1					1
	U61-i0-k110-z04-ta420								1		1
	U61-i3-k100-z05-ta403			1							1
	U61-i4-k100-z01-ta403			1							1
	U61-i4-k100-z05-ta403								1		1
	U61-i4-k176-z04-ta722			1							1
	U61-i5-k100-z04-ta013				1						1
	U61-i5-k102-z04-ta423					1					1
	U61-i6-k000-z00-ta700		1								1
	U61-i6-k100-z01-ta400					1					1
	U61-i6-k100-z01-ta403					1					1
	U61-i6-k100-z04-ta003						1				1
	U61-i6-k100-z04-ta403				1						1
	U61-i6-k100-z05-ta403						1				1
	U61-i7-k000-z01-ta402	1									1
	U61-i7-k100-z01-ta402								1		1
	U61-i7-k100-z04-ta423			1							1
	U61-i7-k100-z05-ta401					1					1
	U61-i7-k106-z01-ta423					1					1
	U61-i7-k130-z04-ta610		1								1
	U62-i6-k000-z03-ta632		1								1
	U62-i6-k100-z00-ta403		1								1
	U63-i0-k000-z00-ta002									1	1
	U63-i0-k000-z00-ta500		1								1
	U63-i0-k004-z04-ta421		1								1
	U63-i0-k004-z04-ta431		1								1
	U63-i0-k010-z04-ta401		1								1
	U63-i0-k100-z00-ta402			1							1
	U63-i0-k100-z00-ta421		1								1
	U63-i0-k100-z00-ta600		1								1
	U63-i0-k100-z01-ta423				1						1
	U63-i0-k100-z02-ta402									1	1
	U63-i0-k100-z02-ta702		1								1
	U63-i0-k100-z04-ta613			1							1
	U63-i0-k100-z05-ta022								1		1
	U63-i0-k100-z05-ta413			1							1
	U63-i0-k100-z05-ta421		1								1
	U63-i0-k100-z06-ta401		1								1
	U63-i0-k100-z06-ta431		1								1
	U63-i0-k100-z07-ta401		1								1
	U63-i0-k100-z07-ta431		1								1
	U63-i0-k100-z11-ta031						1				1
	U63-i0-k100-z12-ta402									1	1
	U63-i0-k100-z14-ta401								1		1
	U63-i0-k111-z00-ta402									1	1
	U63-i0-k126-z05-ta623			1							1
	U63-i0-k175-z00-ta702			1							1
	U63-i0-k177-z04-ta421		1								1
	U63-i1-k100-z05-ta403								1		1
	U63-i2-k100-z00-ta430					1					1
	U63-i2-k100-z00-ta500		1								1
	U63-i2-k100-z04-ta403		1								1
	U63-i3-k100-z04-ta731						1				1
	U63-i3-k100-z05-ta433					1					1
	U63-i3-k104-z01-ta421					1					1
	U63-i4-k000-z00-ta403			1							1
	U63-i4-k000-z01-ta403			1							1
	U63-i4-k100-z00-ta423						1				1
	U63-i4-k100-z00-ta500		1								1
	U63-i4-k100-z00-ta602						1				1
	U63-i4-k100-z01-ta600					1					1
	U63-i4-k100-z04-ta401		1								1
	U63-i4-k100-z04-ta403						1				1
	U63-i4-k100-z04-ta603		1								1
	U63-i4-k100-z04-ta611		1								1
	U63-i4-k100-z05-ta401								1		1
	U63-i4-k100-z10-ta403					1					1
	U63-i4-k100-z17-ta403					1					1
	U63-i4-k102-z00-ta700		1								1
	U63-i4-k102-z01-ta623					1					1
	U63-i4-k102-z04-ta401		1								1
	U63-i4-k103-z00-ta431				1						1
	U63-i4-k106-z01-ta423			1							1
	U63-i4-k107-z12-ta633					1					1
	U63-i4-k110-z05-ta403					1					1
	U63-i4-k114-z04-ta403		1								1
	U63-i4-k114-z05-ta403					1					1
	U63-i4-k177-z06-ta401					1					1
	U63-i4-k177-z17-ta613					1					1
	U63-i5-k100-z01-ta403								1		1
	U63-i5-k100-z01-ta422			1							1
	U63-i5-k100-z04-ta411		1								1
	U63-i5-k100-z04-ta603		1								1
	U63-i5-k100-z05-ta402								1		1
	U63-i5-k102-z04-ta401		1								1
	U63-i5-k107-z16-ta710		1								1
	U63-i5-k114-z04-ta403					1					1
	U63-i6-k000-z02-ta203		1								1
	U63-i6-k004-z00-ta422					1					1
	U63-i6-k005-z03-ta012			1							1
	U63-i6-k100-z00-ta400						1				1
	U63-i6-k100-z00-ta403			1							1
	U63-i6-k100-z00-ta420						1				1
	U63-i6-k100-z00-ta423						1				1
	U63-i6-k100-z00-ta601						1				1
	U63-i6-k100-z00-ta602		1								1
	U63-i6-k100-z00-ta710		1								1
	U63-i6-k100-z01-ta003				1						1
	U63-i6-k100-z01-ta403			1							1
	U63-i6-k100-z01-ta603						1				1
	U63-i6-k100-z02-ta733						1				1
	U63-i6-k100-z03-ta402			1							1
	U63-i6-k100-z04-ta402						1				1
	U63-i6-k100-z04-ta601		1								1
	U63-i6-k100-z04-ta733			1							1
	U63-i6-k100-z05-ta000						1				1
	U63-i6-k100-z05-ta413			1							1
	U63-i6-k100-z05-ta621		1								1
	U63-i6-k100-z07-ta433						1				1
	U63-i6-k100-z07-ta613		1								1
	U63-i6-k100-z12-ta623					1					1
	U63-i6-k101-z00-ta701						1				1
	U63-i6-k101-z03-ta701		1								1
	U63-i6-k101-z05-ta613					1					1
	U63-i6-k101-z17-ta603		1								1
	U63-i6-k102-z04-ta003				1						1
	U63-i6-k103-z01-ta431				1						1
	U63-i6-k104-z00-ta423		1								1
	U63-i6-k104-z02-ta422			1							1
	U63-i6-k104-z05-ta423		1								1
	U63-i6-k104-z07-ta402					1					1
	U63-i6-k104-z16-ta623			1							1
	U63-i6-k106-z01-ta023				1						1
	U63-i6-k106-z06-ta623						1				1
	U63-i6-k110-z00-ta710		1								1
	U63-i6-k110-z04-ta403						1				1
	U63-i6-k116-z07-ta403		1								1
	U63-i6-k137-z15-ta623					1					1
	U63-i6-k171-z00-ta523			1							1
	U63-i6-k173-z05-ta023					1					1
	U63-i6-k175-z06-ta622			1							1
	U63-i6-k177-z01-ta003				1						1
	U63-i6-k177-z05-ta023				1						1
	U63-i7-k000-z01-ta403								1		1
	U63-i7-k000-z12-ta201						1				1
	U63-i7-k003-z12-ta433				1						1
	U63-i7-k012-z01-ta431			1							1
	U63-i7-k047-z15-ta733					1					1
	U63-i7-k100-z00-ta010			1							1
	U63-i7-k100-z00-ta013			1							1
	U63-i7-k100-z00-ta023				1						1
	U63-i7-k100-z00-ta033				1						1
	U63-i7-k100-z00-ta400						1				1
	U63-i7-k100-z00-ta402						1				1
	U63-i7-k100-z00-ta431			1							1
	U63-i7-k100-z00-ta433						1				1
	U63-i7-k100-z00-ta702			1							1
	U63-i7-k100-z00-ta733				1						1
	U63-i7-k100-z01-ta013								1		1
	U63-i7-k100-z01-ta203								1		1
	U63-i7-k100-z01-ta401					1					1
	U63-i7-k100-z01-ta603			1							1
	U63-i7-k100-z01-ta631				1						1
	U63-i7-k100-z02-ta402						1				1
	U63-i7-k100-z03-ta402						1				1
	U63-i7-k100-z03-ta403				1						1
	U63-i7-k100-z03-ta423			1							1
	U63-i7-k100-z04-ta001				1						1
	U63-i7-k100-z04-ta202					1					1
	U63-i7-k100-z04-ta413						1				1
	U63-i7-k100-z04-ta422						1				1
	U63-i7-k100-z04-ta431			1							1
	U63-i7-k100-z04-ta613					1					1
	U63-i7-k100-z05-ta023						1				1
	U63-i7-k100-z05-ta123			1							1
	U63-i7-k100-z05-ta402				1						1
	U63-i7-k100-z05-ta431					1					1
	U63-i7-k100-z05-ta602						1				1
	U63-i7-k100-z05-ta603				1						1
	U63-i7-k100-z06-ta200			1							1
	U63-i7-k100-z06-ta403						1				1
	U63-i7-k100-z06-ta423		1								1
	U63-i7-k100-z06-ta603		1								1
	U63-i7-k100-z06-ta623						1				1
	U63-i7-k100-z07-ta402						1				1
	U63-i7-k100-z07-ta433			1							1
	U63-i7-k100-z07-ta631					1					1
	U63-i7-k100-z11-ta223			1							1
	U63-i7-k100-z11-ta403								1		1
	U63-i7-k100-z12-ta222						1				1
	U63-i7-k100-z14-ta413			1							1
	U63-i7-k100-z14-ta433			1							1
	U63-i7-k100-z14-ta613		1								1
	U63-i7-k100-z15-ta413				1						1
	U63-i7-k100-z15-ta423					1					1
	U63-i7-k100-z15-ta603		1								1
	U63-i7-k100-z16-ta631						1				1
	U63-i7-k100-z17-ta612			1							1
	U63-i7-k100-z17-ta633			1							1
	U63-i7-k100-z17-ta701			1							1
	U63-i7-k100-z17-ta710			1							1
	U63-i7-k100-z17-ta733				1						1
	U63-i7-k101-z00-ta601						1				1
	U63-i7-k101-z01-ta423			1							1
	U63-i7-k102-z01-ta403			1							1
	U63-i7-k102-z01-ta433				1						1
	U63-i7-k102-z04-ta003						1				1
	U63-i7-k102-z04-ta401		1								1
	U63-i7-k102-z04-ta431				1						1
	U63-i7-k102-z05-ta433			1							1
	U63-i7-k102-z15-ta603					1					1
	U63-i7-k102-z16-ta403						1				1
	U63-i7-k103-z00-ta431				1						1
	U63-i7-k103-z01-ta431				1						1
	U63-i7-k104-z01-ta431				1						1
	U63-i7-k104-z04-ta423			1							1
	U63-i7-k104-z05-ta413								1		1
	U63-i7-k104-z05-ta423								1		1
	U63-i7-k104-z05-ta433						1				1
	U63-i7-k104-z05-ta533			1							1
	U63-i7-k104-z05-ta733			1							1
	U63-i7-k104-z12-ta233			1							1
	U63-i7-k105-z17-ta433				1						1
	U63-i7-k106-z00-ta031						1				1
	U63-i7-k106-z01-ta031						1				1
	U63-i7-k106-z01-ta423				1						1
	U63-i7-k106-z01-ta430			1							1
	U63-i7-k106-z01-ta431					1					1
	U63-i7-k106-z01-ta433						1				1
	U63-i7-k106-z03-ta403					1					1
	U63-i7-k106-z04-ta633				1						1
	U63-i7-k106-z05-ta031						1				1
	U63-i7-k106-z05-ta733					1					1
	U63-i7-k106-z06-ta403						1				1
	U63-i7-k106-z17-ta403					1					1
	U63-i7-k107-z01-ta403					1					1
	U63-i7-k107-z01-ta431				1						1
	U63-i7-k107-z04-ta403					1					1
	U63-i7-k107-z05-ta403								1		1
	U63-i7-k107-z07-ta423					1					1
	U63-i7-k107-z17-ta633				1						1
	U63-i7-k110-z04-ta022				1						1
	U63-i7-k116-z01-ta423					1					1
	U63-i7-k117-z00-ta613					1					1
	U63-i7-k120-z01-ta403			1							1
	U63-i7-k120-z07-ta403						1				1
	U63-i7-k121-z07-ta712			1							1
	U63-i7-k126-z07-ta413						1				1
	U63-i7-k127-z01-ta433						1				1
	U63-i7-k127-z03-ta233								1		1
	U63-i7-k134-z16-ta631		1								1
	U63-i7-k137-z03-ta403				1						1
	U63-i7-k137-z17-ta403					1					1
	U63-i7-k140-z03-ta023				1						1
	U63-i7-k146-z01-ta031						1				1
	U63-i7-k164-z05-ta533			1							1
	U63-i7-k167-z13-ta423					1					1
	U63-i7-k176-z07-ta433				1						1
	U63-i7-k177-z01-ta233				1						1
	U63-i7-k177-z02-ta233				1						1
	U63-i7-k177-z05-ta403					1					1
	U63-i7-k177-z07-ta403						1				1
	U63-i7-k177-z13-ta433			1							1
	U63-i7-k177-z14-ta023					1					1
	U71-i4-k175-z02-ta702			1							1
	U71-i4-k177-z17-ta403					1					1
	U73-i0-k100-z04-ta423					1					1
	U73-i4-k000-z07-ta023					1					1
	U73-i4-k100-z04-ta423			1							1
	U73-i4-k104-z15-ta403		1								1
	U73-i4-k120-z05-ta003		1								1
	U73-i4-k177-z07-ta433		1								1
	U73-i5-k100-z01-ta433				1						1
	U73-i5-k100-z04-ta423			1							1
	U73-i5-k100-z05-ta433						1				1
	U73-i5-k100-z06-ta413		1								1
	U73-i5-k100-z07-ta410		1								1
	U73-i5-k100-z17-ta423		1								1
	U73-i5-k102-z11-ta423			1							1
	U73-i5-k103-z05-ta611					1					1
	U73-i5-k110-z05-ta433		1								1
	U73-i6-k000-z01-ta002				1						1
	U73-i6-k100-z00-ta403			1							1
	U73-i6-k100-z00-ta422			1							1
	U73-i6-k100-z00-ta700						1				1
	U73-i6-k100-z04-ta422			1							1
	U73-i6-k100-z04-ta423			1							1
	U73-i6-k100-z05-ta433			1							1
	U73-i6-k100-z10-ta732		1								1
	U73-i6-k100-z17-ta203		1								1
	U73-i6-k100-z17-ta433						1				1
	U73-i6-k101-z02-ta403			1							1
	U73-i6-k101-z04-ta733			1							1
	U73-i6-k115-z16-ta733		1								1
	U73-i6-k133-z14-ta733			1							1
	U73-i6-k150-z06-ta422					1					1
	U73-i6-k175-z05-ta502			1							1
	U73-i6-k175-z15-ta223			1							1
	U73-i6-k176-z07-ta403					1					1
	U73-i7-k000-z01-ta431				1						1
	U73-i7-k000-z02-ta233			1							1
	U73-i7-k000-z03-ta431						1				1
	U73-i7-k000-z03-ta433						1				1
	U73-i7-k000-z10-ta223				1						1
	U73-i7-k004-z01-ta431					1					1
	U73-i7-k004-z03-ta021				1						1
	U73-i7-k100-z00-ta402			1							1
	U73-i7-k100-z00-ta422			1							1
	U73-i7-k100-z01-ta403						1				1
	U73-i7-k100-z01-ta633						1				1
	U73-i7-k100-z03-ta213						1				1
	U73-i7-k100-z03-ta423					1					1
	U73-i7-k100-z04-ta323			1							1
	U73-i7-k100-z04-ta403						1				1
	U73-i7-k100-z04-ta420						1				1
	U73-i7-k100-z05-ta423						1				1
	U73-i7-k100-z07-ta403						1				1
	U73-i7-k100-z15-ta433					1					1
	U73-i7-k100-z17-ta422			1							1
	U73-i7-k100-z17-ta433				1						1
	U73-i7-k100-z17-ta633			1							1
	U73-i7-k101-z05-ta423					1					1
	U73-i7-k102-z03-ta623					1					1
	U73-i7-k102-z07-ta433					1					1
	U73-i7-k103-z05-ta403						1				1
	U73-i7-k104-z01-ta431					1					1
	U73-i7-k104-z02-ta603						1				1
	U73-i7-k104-z05-ta433				1						1
	U73-i7-k104-z07-ta123			1							1
	U73-i7-k104-z15-ta733			1							1
	U73-i7-k105-z17-ta733				1						1
	U73-i7-k106-z01-ta431				1						1
	U73-i7-k106-z01-ta623					1					1
	U73-i7-k106-z13-ta431				1						1
	U73-i7-k106-z15-ta433					1					1
	U73-i7-k107-z01-ta403					1					1
	U73-i7-k107-z01-ta423			1							1
	U73-i7-k107-z05-ta023					1					1
	U73-i7-k107-z05-ta431					1					1
	U73-i7-k107-z05-ta633					1					1
	U73-i7-k107-z07-ta031				1						1
	U73-i7-k107-z07-ta733			1							1
	U73-i7-k107-z15-ta733					1					1
	U73-i7-k107-z17-ta733			1							1
	U73-i7-k120-z05-ta523						1				1
	U73-i7-k120-z07-ta622					1					1
	U73-i7-k121-z07-ta733					1					1
	U73-i7-k170-z14-ta721		1								1
	U73-i7-k173-z17-ta733			1							1
	U73-i7-k177-z03-ta333				1						1
	U73-i7-k177-z03-ta423					1					1
	U73-i7-k177-z15-ta423					1					1
	Total	2	160	166	127	103	197	1	38	13	807
